# Supplementary material
Source: PubMed Central journal article supplement (PMC4636019)
Supplement: NIHMS733094-supplement-supplement_1.pdf [file NIHMS733094-supplement-supplement_1.pdf]

BRIEF SCHOOL-BASED ALCOHOL PREVENTION PROGRAMS

SUPPLEMENTARY MATERIAL

Table S1

*Descriptive Statistics and Bivariate Correlations between Study Characteristics, by Intervention Delivery Format*

|                                | Effect size      | Follow-up timing (weeks) | Duration (minutes) | RCT <sup>a</sup> | Average attrition | United States <sup>a</sup> | Percent male      | Percent White     | Average age (years) | Hazardous use <sup>a</sup> | MET <sup>a</sup> | Personal feedback <sup>a</sup> |
|--------------------------------|------------------|--------------------------|--------------------|------------------|-------------------|----------------------------|-------------------|-------------------|---------------------|----------------------------|------------------|--------------------------------|
|                                | <i>M</i>         | 15.7                     | 130                | .56              | .12               | .33                        | 55                | 56                | 15.63               | .44                        | .11              | .11                            |
|                                | <i>(SD)</i>      | (8.93)                   | (78.10)            | (0.53)           | (0.15)            | (0.5)                      | (18)              | (31)              | (1.34)              | (0.53)                     | (0.33)           | (0.33)                         |
| Effect size                    | —                | -.78*                    | .28                | .18              | -.59              | .93*                       | .32               | .00               | .52                 | .30                        | .01              | -.08                           |
| Follow-up timing               | 16.31<br>(6.17)  | -.04                     | .07                | -.27             | .22               | -.61 <sup>†</sup>          | -.35              | -.06              | -.13                | -.30                       | .42              | .06                            |
| Duration                       | 68.29<br>(39.35) | .63                      | .37                | .15              | -.18              | .29                        | -.57              | -.30              | -.18                | -.52                       | -.19             | .24                            |
| RCT <sup>a</sup>               | .75<br>(0.46)    | -.04                     | -.95*              | -.29             | -.03              | .63 <sup>†</sup>           | -.41              | .89*              | -.35                | -.55                       | -.40             | .32                            |
| Average attrition              | .14<br>(0.19)    | .55                      | -.22               | .27              | .28               | -.30                       | -.43              | -.60              | -.19                | .17                        | -.33             | -.18                           |
| United States <sup>a</sup>     | .5<br>(0.53)     | -.11                     | .03                | -.37             | 0                 | -.56                       | -.23              | .12               | .07                 | -.16                       | -.25             | -.25                           |
| Percent male                   | 51<br>(7)        | .62                      | -.35               | .42              | .22               | .78 <sup>†</sup>           | -.72 <sup>†</sup> | .80 <sup>†</sup>  | .33                 | .38                        | .18              | -.13                           |
| Percent White                  | 27<br>(31)       | -.48                     | .67 <sup>†</sup>   | -.08             | -.55              | -.45                       | .83*              | -.79 <sup>†</sup> | -.23                | -.51                       |                  | .49                            |
| Average age                    | 15.53<br>(1.34)  | .12                      | .55                | .83*             | -.35              | .40                        | -.38              | -.02              | -.01                | .64 <sup>†</sup>           | .41              | .01                            |
| Hazardous use <sup>a</sup>     | .63<br>(0.52)    | .43                      | .40                | .86*             | -.45              | .36                        | -.77*             | .61               | -.44                | .54                        | .40              | -.32                           |
| MET <sup>a</sup>               | 1<br>(0)         |                          |                    |                  |                   |                            |                   |                   |                     |                            |                  | -.13                           |
| Personal feedback <sup>a</sup> | .75<br>(0.46)    | -.41                     | -.16               | -.00             | .33               | .42                        | -.58              | .17               | -.26                | .27                        | .15              |                                |

*Note.* Bivariate correlations for individually-delivered studies are presented below the diagonal (means and standard deviations in the first column), and bivariate correlations for group-delivered studies are presented above the diagonal (means and standard deviations in the first row).

<sup>a</sup> Indicates dichotomous variable where 1= yes (i.e., RCT, located in America, hazardous alcohol use, use of MET, personal feedback) and 0 = else.

<sup>†</sup>  $p < .10$ . \* $p < .05$ .

## BRIEF SCHOOL-BASED ALCOHOL PREVENTION PROGRAMS

Table S2

*Effect of Study Method and Quality on Outcomes*

| Study Quality Variables | Model 1 <sup>a</sup> |               | Model 2<br>( <i>k</i> = 17) |               | Model 3<br>( <i>k</i> = 17) |               | Model 4<br>( <i>k</i> = 15) |                |
|-------------------------|----------------------|---------------|-----------------------------|---------------|-----------------------------|---------------|-----------------------------|----------------|
|                         | <i>b</i>             | 95% CI        | <i>b</i>                    | 95% CI        | <i>b</i>                    | 95% CI        | <i>b</i>                    | 95% CI         |
| Format (Group = 1)      | -0.49 <sup>†</sup>   | [-1.00, 0.01] | -0.49 <sup>†</sup>          | [-1.02, 0.03] | -0.44                       | [-0.98, 0.10] | -0.68 *                     | [-1.19, -0.17] |
| RCT (yes = 1)           | 0.32                 | [-0.30, 0.94] | 0.29                        | [-0.29, 0.86] |                             |               |                             |                |
| Monitoring (yes = 1)    | 0.38                 | [-0.23, 0.98] |                             |               | 0.25                        | [-0.35, 0.84] |                             |                |
| Average attrition       | 1.02                 | [-1.04, 3.09] |                             |               |                             |               | 1.11                        | [-0.61, 2.82]  |
| Constant                |                      |               | 0.36                        | [-0.18, 0.90] | 0.47 *                      | [0.05, 0.90]  | 0.54 *                      | [0.15, 0.93]   |
| $\tau^2$                |                      |               | 0.16                        |               | 0.16                        |               | 0.11                        |                |
| $I^2$ res (%)           |                      |               | 69.46                       |               | 68.18                       |               | 64.29                       |                |
| Adjusted R <sup>2</sup> |                      |               | 13.69                       |               | 13.18                       |               | 45                          |                |

*Note:* *k* = number of studies. *b* = unstandardized coefficient from meta-regression model. CI = confidence interval. RCT = randomized control trial.

<sup>a</sup>Model 1 column includes coefficients from four separate bivariate meta-regression models.

<sup>†</sup>*p* < .10. \**p* < .05.
